# Supplementary material for: Carbon nanotubes as a nanocatalyst and nanoreactor for the efficient treatment of pharmaceutical wastewater via CaSO3 activation
Source: Royal Society of Chemistry journal article supplement (doi:10.1039/d4en00026a), 2024-01-01
Supplement: d4en00026a1.pdf [file d4en00026a1.pdf]

**Carbon nanotube as a nanocatalyst and nanoreactor for efficient treatment of  
actual pharmaceutical wastewater *via* CaSO<sub>3</sub> activation**

*Haoqi Wang,<sup>a</sup> Xiaohong Liu,<sup>a</sup> Yanlan Wang,<sup>b</sup> Yiqun Tian,<sup>c</sup> Yingping Huang,<sup>a</sup>*

*Di Huang<sup>a\*</sup> and Xiang Liu,<sup>a\*</sup>*

<sup>a</sup>College of Materials and Chemical Engineering, China Three Gorges University, Yichang 443002, China. Email: [xiang.liu@ctgu.edu.cn](mailto:xiang.liu@ctgu.edu.cn)

(X. Liu) and [huangd94@iccas.ac.cn](mailto:huangd94@iccas.ac.cn) (D. Huang)

<sup>b</sup>Shandong Provincial Key Laboratory of Chemical Energy Storage and Novel Cell Technology, Department of Chemistry and Chemical  
engineering, Liaocheng University, 252059 Liaocheng, China

<sup>c</sup>Hubei Yichang Xingfa Group Co. LTD, Yichang, Hubei 443002, China

**Table of Content**

|                                                                                           |    |
|-------------------------------------------------------------------------------------------|----|
| 1. Materials.....                                                                         | S2 |
| 2. Characterization.....                                                                  | S2 |
| 3. Experimental Procedures.....                                                           | S3 |
| 4. Seed germination experiments.....                                                      | S3 |
| 5. Catalytic performance and Physical characterization of nanocatalysts (Fig S1-S9) ..... | S4 |

## 1. Materials.

The chemicals are used without further purification. The deionized water was prepared in the laboratory. Carbon nanotubes (CNTs) was purchased from 3A Materials Co., Ltd; Sodium sulfite ( $\text{NaSO}_3$ ) was purchased from Aladdin chemical reagent Co., Ltd; Calcium sulfite ( $\text{CaSO}_3$ ) was purchased from Aladdin chemical reagent Co., Ltd; Tetracycline (TC), Humic acid (HA), Sodium bicarbonate ( $\text{NaHCO}_3$ ), Sodium bisulfite ( $\text{NaHSO}_3$ ) and Tert-Butanol (TBA) were purchased from Shanghai Macklin Biochemical Co., Ltd; Oxytetracycline (OTC) and Chlortetracycline (CTC) were purchased from Dr. ehrenstorfer Co., Ltd; Perchloric acid was purchased from Chron Chemicals Co., Ltd; Sodium hydroxide ( $\text{NaOH}$ ) and Sodium chloride ( $\text{NaCl}$ ) were purchased from Kermel Co., Ltd; Sodium dihydrogen phosphate dihydrate ( $\text{NaH}_2\text{PO}_4$ ) was purchased from Shanghai Hushi Co., Ltd; Sodium nitrate ( $\text{NaNO}_3$ ) was purchased from Innochem Co., Ltd; Furfuryl alcohol (FFA) was purchased from Rhawn Reagent Co., Ltd. Silver nitrate ( $\text{AgNO}_3$ ) was purchased from Sigma Aldrich Co., Ltd.

## 2. Characterization

Transmission electron microscopy (TEM) was performed with a JEOL jem-f200 microscope operated. The morphologies of the catalysts were observed by scanning electron microscopy (SEM, JSM-7500F). X-ray diffraction (XRD) analyses were measured on a SmartLab. X-ray photoelectron spectrometry (XPS) was performed on a AXIS Supra. Electron paramagnetic resonance (EPR) spectroscopy was conducted on a Bruker A300. Fourier transform infrared spectrometer (FT-IR) were measured on Frontier NIR. Raman was performed on a Thermo Scientific DXR . High resolution mass spectrum (HR-MS) was measured on a Q Exactive. UV-vis

was tested by PerkinElmer Lambda 25.

### 3. Experimental Procedures.

In a typical procedure, 2 mg of  $\text{CaSO}_3$  had been added into TC solution (20 mg/L, 40 mL) in a test tube at 30 °C. Then, TC degradation was activated by adding CNT (8 mg). During the reaction, a 3 mL of reaction solution had been extracted out at determined intervals. It was filtered by 0.22  $\mu\text{m}$  film, and immediately tested by UV-vis. In the quenching experiments, TBA, EtOH, FFA and  $\text{CHCl}_3$ , respectively, was injected into the reaction medium, and the TC degradation was carried out at the same condition. Cycle experiment: The CNT was collected by the simple filtration, washed with hydrochloric acid solution for next cycle.

The degradation rate was calculated as:

$$\text{Degradation rate (\%)} = \frac{C_0 - C_t}{C_0} \times 100\%$$

where  $C_0$  and  $C_t$  are the initial and final pollutant concentration determined on UV absorbance value.

### 4. Seed germination experiments

Seeds of wheat were collected from the local market. The seeds (50) were placed on each Petri dish. A piece of suitably sized filter paper was put into it. Five mL of TC (50 mg/L of TC) and an TC degraded aqueous solution (50 mg/L of TC, 0.5 g/L of CNT and 0.125 g/L of  $\text{CaSO}_3$  at 30 °C) was added into the petri dish, respectively. The seed contained in petri dishes were incubated in the dark at 25 °C for 3 days. The control group was treated with distilled water. Afterward, distilled water (2 mL) was added daily to maintain sufficient moisture content for germination and

the germination percentage was recorded. All tests were repeated three times.

## 5. Catalytic performance and Physical characterization of nanocatalysts (Fig. S1-S9)

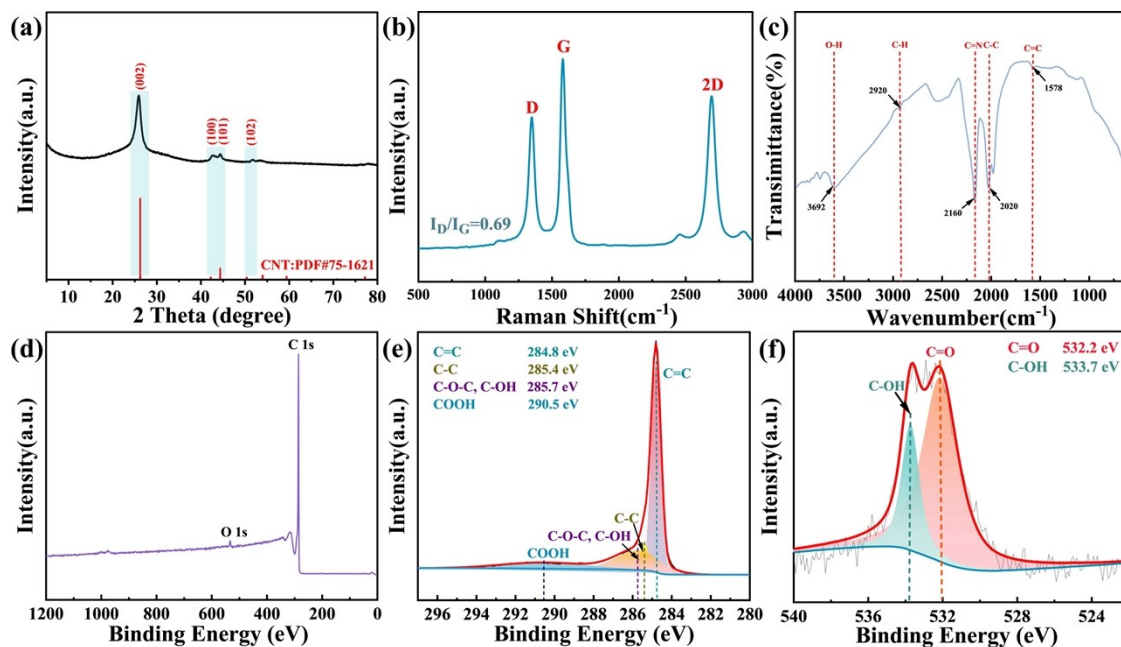

**Figure S1.** (a) XRD, (b) Raman spectra, (c) FT-IR, (d) Sum, (e) C 1s and (f) O 1s XPS of CNTs.

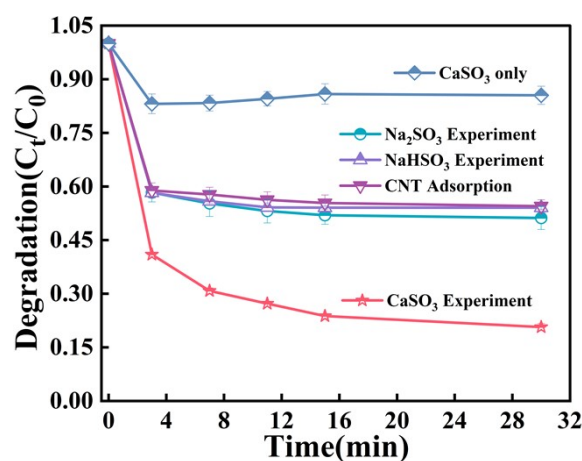

**Figure S2.** TC adsorption by only CNT, degradation by only CaSO<sub>3</sub> and comparison of TC degradation catalyzed by CNT with CaSO<sub>3</sub>, Na<sub>2</sub>SO<sub>3</sub> and NaHSO<sub>3</sub>. respectively. Reaction Conditions: 0.2 g/L of CNTs, 0.05 g/L of sulfites and 20 mg/L of TC at 30 °C.

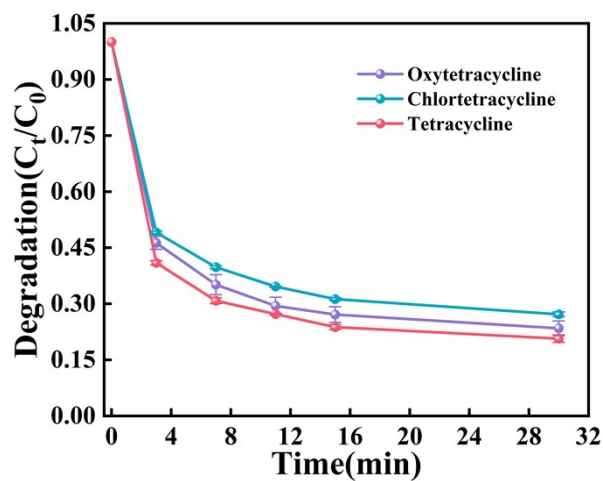

**Figure S3.** CNT catalyzed degradation of CTC, OTC, and TC *via*  $\text{CaSO}_3$  activation. Reaction

Conditions: 0.2 g/L of CNTs, 0.05 g/L of sulfites and 20 mg/L of pollutants at 30 °C.

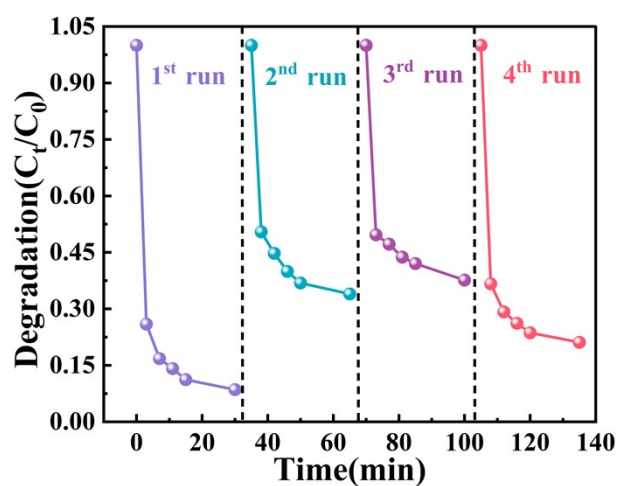

**Figure S4.** Stability of CNT in TC degradation. Reaction Conditions: 0.3 g/L of CNTs, 0.05 g/L

of sulfites and 20 mg/L of TC at 30 °C.

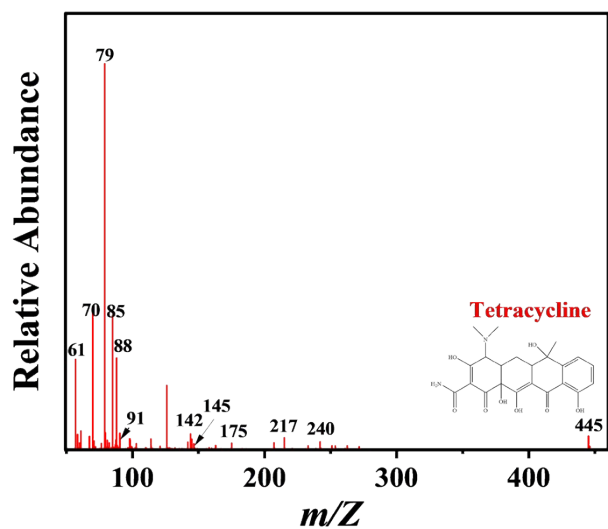

Figure S5. HR-MS of degraded TC solution

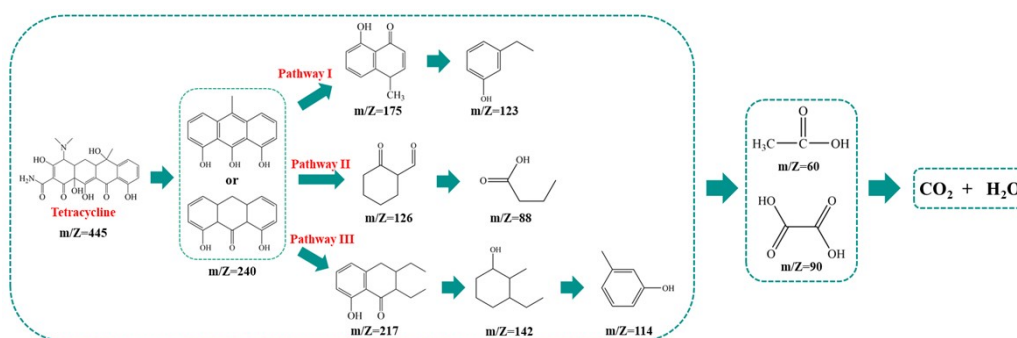

Figure S6. The possible TC degradation pathways over CNTs/CaSO<sub>3</sub> system.

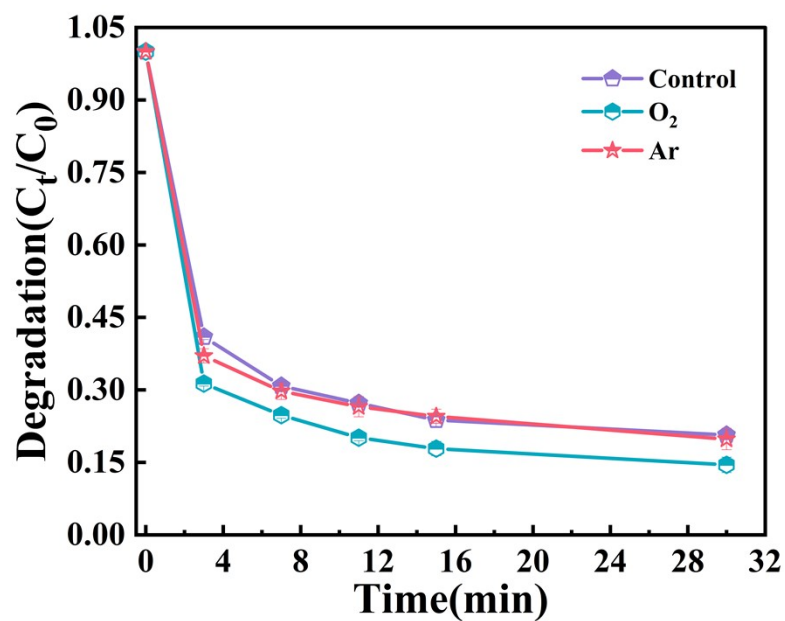

**Figure S7.** TC degradation was carried out at air and O<sub>2</sub> atmosphere, respectively. Reaction

Conditions: 0.2 g/L of CNTs, 0.05 g/L of sulfites and 20 mg/L of TC at 30 °C.

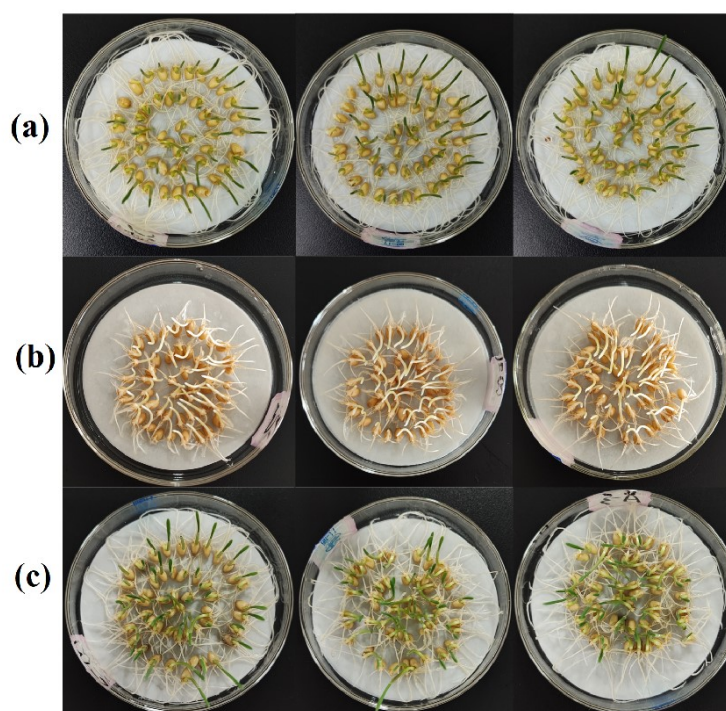

**Figure S8.** Photographs of wheat seeds with (a) ultrapure water, (b) TC aqueous solution (50 mg/L) and (c) degraded TC aqueous solution under 3 days.

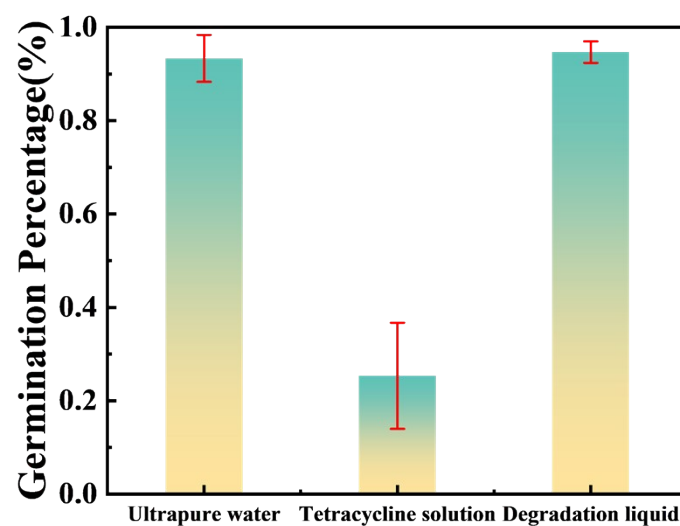

**Figure S9.** Germination rate of wheat seeds treated with (a) ultrapure water, (b) TC aqueous solution (50 mg/L) and (c) degraded TC aqueous solution under 3 days.

**Table S1. Comparison of the catalytic activity of CNT/CaSO<sub>3</sub> system with other reported catalytic systems for TC degradation.**

| Entry | C <sub>(TC)</sub><br>(mg/L) | Catalyst<br>(g/L)                           | Oxidant                      | Another<br>additive | Degradation<br>efficiency | Time/min | Ref.      |
|-------|-----------------------------|---------------------------------------------|------------------------------|---------------------|---------------------------|----------|-----------|
| 1     | 20                          | CNT (0.2)                                   | CaSO <sub>3</sub> (0.05 g/L) | —                   | 80%                       | 30       | This work |
| 2     | 50                          | CB (0.05)                                   | PDS (1 g/L)                  | pH=5                | 52%                       | 40       | S1        |
| 3     | 20                          | P-C <sub>3</sub> N <sub>4</sub> (0.2)       | PMS (6 mM)                   | —                   | 77%                       | 60       | S2        |
| 4     | 20                          | F, N-CM (0.02)                              | PMS (0.1 g/L)                | —                   | 80%                       | 60       | S3        |
| 5     | 20                          | SSB1000 (1)                                 | PS (6 mM)                    | —                   | 100%                      | 15       | S4        |
| 6     | 10                          | 40% C-BN (0.6)                              | PMS (0.8 g/L)                | pH=7                | 99%                       | 45       | S5        |
| 7     | 20                          | CNC (0.25)                                  | PS (2 mM)                    | Light               | 82%                       | 60       | S6        |
| 8     | 15                          | BC-OH-700 (0.2)                             | PMS (1 mM)                   | pH=7                | 100%                      | 60       | S7        |
| 9     | 10                          | MCHS (0.01)                                 | PS (0.5 mM)                  | —                   | 95%                       | 180      | S8        |
| 10    | 10                          | N/O-C-8 (0.1)                               | PDS (0.18 mM)                | —                   | 100%                      | 30       | S9        |
| 11    | 20                          | BCNT-5 (0.2)                                | PMS (0.5 mM)                 | —                   | 78%                       | 180      | S10       |
| 12    | 100                         | CCBC (0.2)                                  | PDS (1 g/L)                  | —                   | 83%                       | 180      | S11       |
| 13    | 10                          | Fe (IV) (0.0075)                            | CaSO <sub>3</sub> (100 μM)   | pH=7                | 100%                      | 0.5      | S12       |
| 14    | 20                          | Co <sub>3</sub> Cu <sub>1</sub> -LDHs (0.1) | CaSO <sub>3</sub> (2 mM)     | —                   | 90%                       | 60       | S13       |

[S1] Yanxi Chen, Renli Yin, Lixi Zeng, Wanqian Guo, Mingshan Zhu, Insight into the effects of hydroxyl groups on the rates and pathways of tetracycline antibiotics degradation in the carbon black activated peroxydisulfate oxidation process. Journal of Hazardous Materials, 2021, 412, 125256.

- [S2] Liquan Wang, Ruyi Li, Yimin Zhang, Baohua Tu, Yuan Zhao, Ting Chen, Yuexiang Gao, Phosphorus doping to enhance the peroxymonosulfate activation efficiency of carbon nitride for degrading tetracycline. *Journal of Water Process Engineering*, 2023, 54, 103916.
- [S3] Li Huang, Xiaobo Gong, Jinling Xie, Lingrui Zhang, Xuan Luo, Fluorine and nitrogen dual-doped carbon material as metal-free peroxymonosulfate activator for efficient tetracycline degradation: Radical-free mechanism. *Chemical Engineering Science*, 2023, 280, 118979.
- [S4] Ran Duan, Shuanglong Ma, Shengjun Xu, Beibei Wang, Mengfei He, Guangxin Li, Haichao Fu, Peng Zhao, Soybean straw biochar activating peroxydisulfate to simultaneously eliminate tetracycline and tetracycline resistance bacteria: Insights on the mechanism. *Water Research*, 2022, 218, 118489.
- [S5] Qiling Zheng, Jinghua Guo, Xiaohua Ren, Weijie Zhang, Hongjie Qin, Penghui Zhang, Shouwei Zhang, Xijin Xu, Singlet oxygen triggered by carbon doped boron nitride nanosheets for enhanced removal of tetracycline by peroxymonosulfate activation. *Journal of Environmental Chemical Engineering*, 2023, 11, 110863.
- [S6] Chao Yin, Yali Liu, Xiaorong Kang, Xin Li, Synergistic degradation of tetracycline by CDs decorated g-C<sub>3</sub>N<sub>4</sub> under LED light irradiation combined with the persulfate-based advanced oxidation process. *Applied Catalysis A, General*, 2022, 636, 118571.
- [S7] Ting-Shu Yang, Yang Zhang, Xiao-Qiang Cao, Jian Zhang, Yu-jiao Kan, Bo Wei, Yi-zhen Zhang, Zi-zheng Wang, Zhi-yang Jiao, Xiao-xuan Zhang, Rui Li, Water caltrop-based carbon catalysts for cooperative adsorption and heterogeneous activation of peroxymonosulfate for tetracycline oxidation via electron transfer and non-radical pathway.

Applied Surface Science, 2022, 54823.

- [S8] Alam Venugopal Narendra Kumar, Won Sik Shin, Engineered mesoporous hollow carbon spheres for pollutant degradation: Disclosing catalytic activity, matrix effect, transport, and aquatic ecotoxicity. Chemical Engineering Journal ,2023, 454, 140475.
- [S9] Sijin Zuo, Shengcai Zhu, Jiaying Wang, Weiping Liu, Juan Wang, Boosting Fenton-like reaction efficiency by co-construction of the adsorption and reactive sites on N/O co-doped carbon. Applied Catalysis B: Environmental, 2022, 301, 120783.
- [S10] Junjie Zhang, Yongjia Hong, Wenran Gao, Jiazi Xu, Li Zhang, Bin Sun, Bamboo-like Carbon Nanotubes with the Theoretical Upper-Limit N-Doping Concentration for Advanced Nonradical Oxidation. ACS Applied Nano Materials, 2023, 6, 22283-22290.
- [S11] Jiajing Zou, Jiangfang Yu, Lin Tang, Xiaoya Ren, Ya Pang, Hao Zhang, Qingqing Xie, Yani Liu, Haoyu Liu, Ting Luo, Analysis of reaction pathways and catalytic sites on metal-free porous biochar for persulfate activation process. Chemosphere, 2020, 261, 127747.
- [S12] Lingxiang Zhao, Xinyue Cheng, Zhaoxian Wang, Enzhe Zhang, Zilian Liu, Huajing Zhou, Liang He, Qingqing Guan, Generating high-valent iron-oxo  $\equiv\text{Fe}^{\text{IV}}=\text{O}$  complexes by calcium sulfite activation in neutral microenvironments for enhanced degradation of CIP. Environmental Pollution, 2023, 336, 122449.
- [S13] Xiaoyan Lu, Kai Wang, Dedong Wu, Pengfei Xiao, Rapid degradation and detoxification of metronidazole using calcium sulfite activated by CoCu two-dimensional layered bimetallic hydroxides: Performance, mechanism, and degradation pathway. Chemosphere, 2023, 341, 140150.
